# Supplementary material
Source: PubMed Central journal article supplement (PMC5823760)

# Graphic Abstract

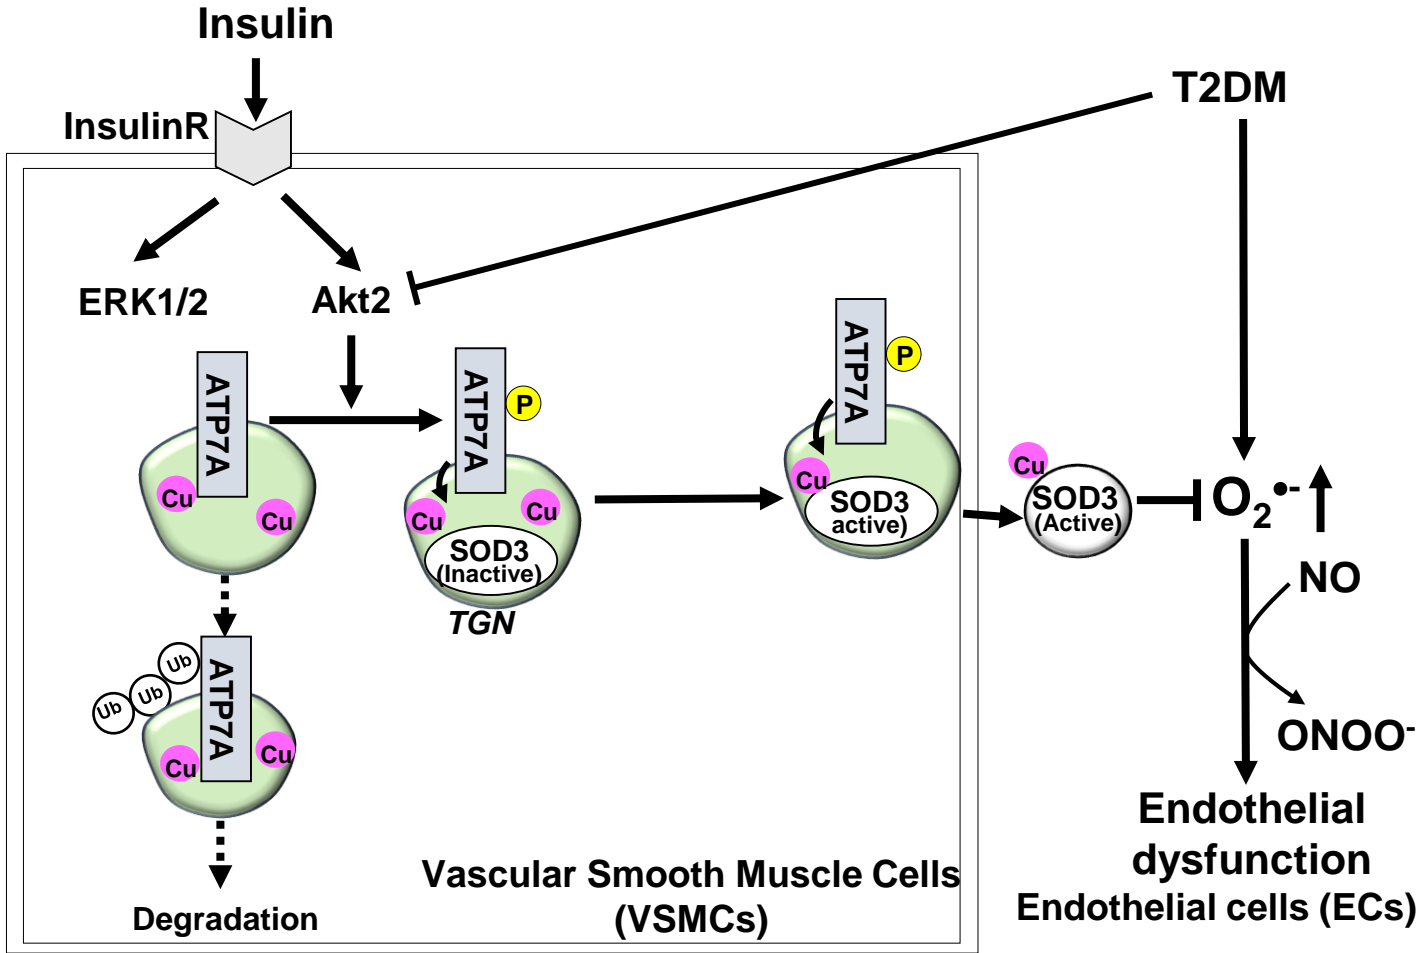

Supplement: NIHMS930720-supplement-Graphic_Abstract.pdf [file NIHMS930720-supplement-Graphic_Abstract.pdf]
